# Supplementary material for: Design of a fluorescent and clickable Ag38(SRN3)24 nanocluster platform: synthesis, modeling and self-assembling
Source: Royal Society of Chemistry journal article supplement (doi:10.1039/d1na00090j), 2021-01-01
Supplement: d1na00090j1.pdf [file d1na00090j1.pdf]

## Supporting Information

**Materials.** All the chemicals were commercially available and were used without purification.

Tetrabromomethane, triphenylphosphine, dichloromethane, acetone, water for HPLC, DMSO dry, sodium azide, lithium bromide and Amberlyst 15 were purchased from Sigma Aldrich.

**Instruments.**  $^1\text{H}$  NMR spectra were recorded using a Bruker Avance 400 (400 MHz). Residual solvent peaks were used as internal references for  $^1\text{H}$  NMR spectra: chloroform ( $\delta$  7.26 ppm).

Chemical shifts ( $\delta$ ) are reported in parts per million (ppm) and coupling constants ( $J$ ) are reported in Hz. Splitting patterns are designated as s, singlet; bs, broad singlet; d, doublet; bd, broad doublet dd, doublet of doublets; ddd, doublet of doublet of doublets; t, triplet; bt, broad triplet; dt, doublet of triplets; ddt, doublet of doublet of triplets; q, quartet; m, multiplet.  $^{13}\text{C}$  spectra were recorded using a Bruker Avance 400 (101 MHz). Chemical shifts ( $\delta$ ) are reported in parts per million (ppm) relative to the internal standard of the residue solvent peak: chloroform (77.2 ppm).

The preparation of the ligand 11-azido-1-bromoundecan-2-ol is accomplished as sketched in the following synthetic scheme:

### Synthetic scheme:

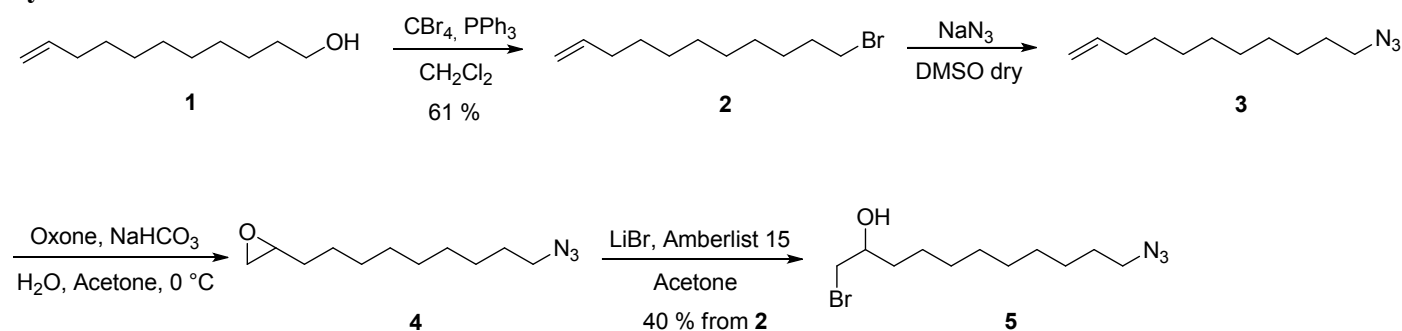

**11-bromoundec-1-ene (2):** 1.25 mmol of  $\text{CBr}_4$  (420 mg) were added to a solution of **1** (1 mmol, 0.20 ml) in 2.5 ml of  $\text{CH}_2\text{Cl}_2$ . The mixture was cooled at  $0^\circ\text{C}$  and 1.88 mmol (490 mg) of  $\text{PPh}_3$  were added in portions. The reaction mixture was stirred at room temperature for 12 hours and the solvent was evaporated *in vacuo*. The residue was dissolved in diethyl ether and the insoluble white solid eliminated by filtration. This operation was repeated several times until the complete removal of the solid. The crude product was purified by flash chromatography (Hex/AcOEt, 96:4) to afford 142 mg of **2** (61%).  $^1\text{H}$  NMR (400 MHz,  $\text{CDCl}_3$ ):  $\delta$  5.81 (ddt,  $J = 16.9, 10.2, 6.7$  Hz, 1H,  $\text{CH}=\text{CH}_2$ ), 5.03-4.90 (m, 2H,  $\text{CH}=\text{CH}_2$ ), 3.40 (t,  $J = 6.9$  Hz, 2H,  $\text{CH}_2\text{Br}$ ), 2.10-1.99 (m, 2H,  $\text{CH}_2\text{CH}=\text{CH}_2$ ), 1.91-1.80 (m, 2H,  $\text{CH}_2\text{CH}_2\text{Br}$ ), 1.48-1.23 (m, 12H,  $=\text{CHCH}_2(\text{CH}_2)_6\text{CH}_2\text{CH}_2\text{Br}$ ).  $^{13}\text{C}$  NMR (101 MHz,  $\text{CDCl}_3$ ):  $\delta$  139.3, 114.3, 34.1, 33.9, 33.0, 29.5, 29.5, 29.2, 29.0, 28.9, 28.3.

**11-azidoundec-1-ene (3):** To a solution of **2** (1 mmol) in 1.3 ml of DMSO dry were added 4 mmol 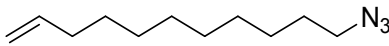N<sub>3</sub> (260 mg) of NaN<sub>3</sub> under argon atmosphere. The reaction mixture was stirred at room temperature for 12 hours, then diluted with Et<sub>2</sub>O and the organic layer was washed seven times with small portions of water. The aqueous layer was extracted with Et<sub>2</sub>O three times, then the combined organic layers were washed with brine and dried over Na<sub>2</sub>SO<sub>4</sub>. The solvent was evaporated *in vacuo* to afford crude azide **3**. <sup>1</sup>H NMR (400 MHz, CDCl<sub>3</sub>): δ 5.80 (ddt, *J* = 16.9, 10.2, 6.7 Hz, 1H, CH=CH<sub>2</sub>), 5.03-4.88 (m, 2H, CH=CH<sub>2</sub>), 3.24 (t, *J* = 7.0 Hz, 2H, CH<sub>2</sub>N<sub>3</sub>), 2.09-1.99 (m, 2H, CH<sub>2</sub>CH=CH<sub>2</sub>), 1.64-1.53 (m, 2H, CH<sub>2</sub>CH<sub>2</sub>N<sub>3</sub>), 1.42-1.26 (m, 12H, =CHCH<sub>2</sub>(CH<sub>2</sub>)<sub>6</sub>CH<sub>2</sub>CH<sub>2</sub>N<sub>3</sub>). <sup>13</sup>C NMR (101 MHz, CDCl<sub>3</sub>): δ 139.2, 114.2, 51.6, 33.9, 29.5, 29.5, 29.2, 29.2, 29.0, 28.9, 26.8.

**2-(9-azidononyl)oxirane (4):** To a solution of crude azide **3** (1 mmol) in 15 ml of acetone were added 7.7 mmol (650 mg) of NaHCO<sub>3</sub> dissolved in 3.3 ml of water. The mixture was cooled at 0 °C and 5 mmol of Oxone (1.56 g) dissolved in 6.6 ml of water were added dropwise. The reaction mixture was stirred at room temperature for 2 hours, then it was filtered and concentrated *in vacuo*. The residue was dissolved in Et<sub>2</sub>O and washed with water. The aqueous layer was extracted with Et<sub>2</sub>O three times. The combined organic layers were washed with saturated NaHCO<sub>3</sub>, brine, dried over Na<sub>2</sub>SO<sub>4</sub> and the solvent was removed *in vacuo* affording the crude epoxy azide **4**. <sup>1</sup>H NMR (400 MHz, CDCl<sub>3</sub>): δ 3.22 (t, *J* = 7.0 Hz, 2H, CH<sub>2</sub>N<sub>3</sub>), 2.92-2.83 (m, 1H, OCH<sub>2</sub>CH<sub>2</sub>), 2.71 (dd, *J* = 5.0, 4.0 Hz, 1H, CH<sub>α</sub>H<sub>β</sub>O), 2.43 (dd, *J* = 5.1, 2.7 Hz, 1H, CH<sub>α</sub>H<sub>β</sub>O), 1.63-1.22 (m, 16H, CH(CH<sub>2</sub>)<sub>8</sub>CH<sub>2</sub>N<sub>3</sub>). <sup>13</sup>C NMR (101 MHz, CDCl<sub>3</sub>): δ 52.4, 51.5, 47.1, 32.5, 29.5, 29.4, 29.4, 29.2, 28.9, 26.7, 26.0.

**11-azido-1-bromoundecan-2-ol (5):** To a solution of crude epoxy azide **4** (1 mmol) in 20 ml of acetone were added 4 mmol (0.35 g) of LiBr and 1 mmol of Amberlyst 15 at 0 °C. The reaction mixture was stirred at room temperature for 12 hours, then filtered through a pad of celite with acetone and concentrated *in vacuo*. The residue was dissolved in AcOEt and washed with water. The aqueous layer was extracted three times with AcOEt. The combined organic layers were washed with brine, dried over Na<sub>2</sub>SO<sub>4</sub> and the solvent was evaporated *in vacuo*. The crude product was purified by flash chromatography (Hex/ AcOEt 8:2) to afford 201 mg of **5** (40 % over three steps). <sup>1</sup>H NMR (400 MHz, CDCl<sub>3</sub>): δ 3.82-3.71 (m, 1H, CHOH), 3.53 (dd, *J* = 10.3, 3.3 Hz, 1H, CH<sub>α</sub>H<sub>β</sub>Br), 3.37 (dd, *J* = 10.3, 7.1 Hz, 1H, CH<sub>α</sub>H<sub>β</sub>Br), 3.24 (t, *J* = 6.9 Hz, 2H, CH<sub>2</sub>N<sub>3</sub>), 2.08 (bs, 1H, OH), 1.65-1.26 (m, 16H, CH(CH<sub>2</sub>)<sub>8</sub>CH<sub>2</sub>N<sub>3</sub>). <sup>13</sup>C NMR (101 MHz, CDCl<sub>3</sub>): δ 71.2, 51.6, 40.8, 35.2, 29.53, 29.5, 29.2, 28.9, 26.8, 25.7.

## SAXS model

SAXS profile,  $I(q)$ , presents different features; alongside the main 3D lamellar phase and the 2D hexagonal phase described in the text (Fig. 4) we focus here on the low- $q$  part ( $q < 1.2 \text{ nm}^{-1}$ ) shown in the grey region of Fig. 4b. This part has been modelled by correlated defects in the hard sphere model, by the sum of two components:

$$I(q) = I_B(q) + I_D(q) \quad (1)$$

The first component,  $I_B(q)$ , predominating at lower  $q$  is given by a power law behavior with exponent  $P_B$  and it is ascribed to the formation of the large particles, P; the second one,  $I_D(q)$ , describes correlated defects nanoregions as interacting hard-spheres. The two components can be written as

$$I_B(q) = A_B + C_B q^{P_B} \quad (2)$$

$$I_D(q) = C_D S(q, R_{HS}, f_p) F(q, R) = C_D S(q, R_{HS}, f_p) \int_0^{\infty} P(R) [V(R) \Phi(R) R] dR \quad (3)$$

$A_B$  and  $C_B$  are constant values and  $P_B$  is the power exponent. The  $I_D(q)$  term takes into account the formation of spherical correlated defects with radius  $R$ ;  $C_D$  is a constant independent of  $q$  and  $R$ ;  $V(R)$  and  $\Phi(q, R)$  are the volume and the form factor of the single spherical particle, respectively. In order to account for the polydispersity,  $\sigma$ , of the defect size, the intensity has been integrated over a Schultz-Zimm distribution of  $R$ ,  $P(R)$ .<sup>64</sup> Finally, the structure factor  $S(q, R_{HS}, \eta)$  has been modeled in the monodisperse approximation of hard spheres with radius  $R_{HS}$  and volume fraction  $\eta$  calculated with the Percus-Yevick equation.<sup>65</sup> We used the trust-region-reflective algorithm,<sup>66</sup> in order to fit the data and estimate the  $A_B$  and  $C_B$  constants, the power exponent  $P_B$  of the background term in  $I_B(q)$ , the constant  $C_D$ , the mean radius  $R$  and the dispersivity  $\sigma$  of the Schultz-Zimm defects distribution size  $P(R)$ , the hard sphere radius  $R_{HS}$  and volume fraction  $\eta$  in the Percus-Yevick approximation. We find  $R=R_{HS}=5$  nm indicating a pure hard sphere defect distribution made of packed defects of 5 nm and a volume fraction of  $\eta=0.3$ .

This defect network, sketched in Figure 4e, permeates the lamellar and the hexagonal phases aggregating in larger particles, P, with sharp interface since the  $P_B$  exponent is found to be -4 indicating a Porod regime.

**Table S1:** Topology for the force field.

| Atom id | Atom | Atom topology                         | Valence |
|---------|------|---------------------------------------|---------|
| 10      | N    | Azide Terminal                        | 1       |
| 15      | S    | S Bivalent                            | 2       |
| 17      | S    | S Trivalent                           | 3       |
| 45      | N    | Azide Central                         | 2       |
| 107     | N    | Azide carbon-side                     | 2       |
| 152     | Ag   | Ag Metal Core                         | 0       |
| 157     | Ag   | Ag Ligand: bonds with 3 Ag-core atoms | 2       |
| 158     | Ag   | Ag Ligand: bonds with 2 Ag-core atoms | 2       |

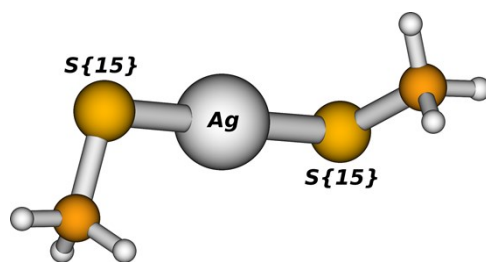

**Figure S1:** Structure of the  $L_1$  ligand with the methyl as the alkyl chain. The atom identifiers of the sulfur are described in the main text.

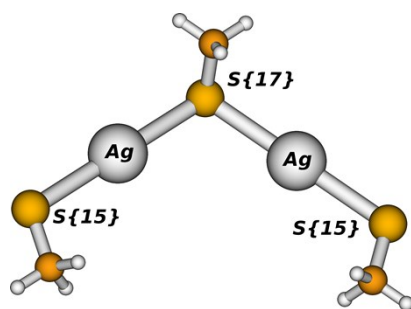

**Figure S2:** Structure of the  $L_2$  ligand with the methyl as the alkyl chain. The atom identifiers of the sulfur are described in the main text.

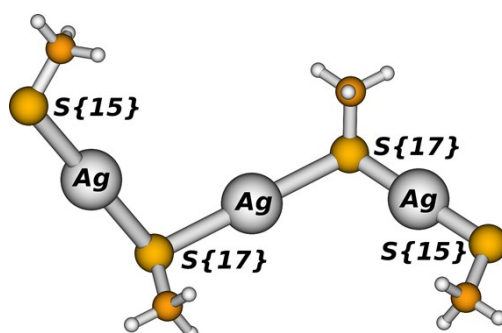

**Figure S3** Structure of the  $L_3$  ligand with the methyl as the alkyl chain. The atom identifiers of the sulfur are described in the main text.

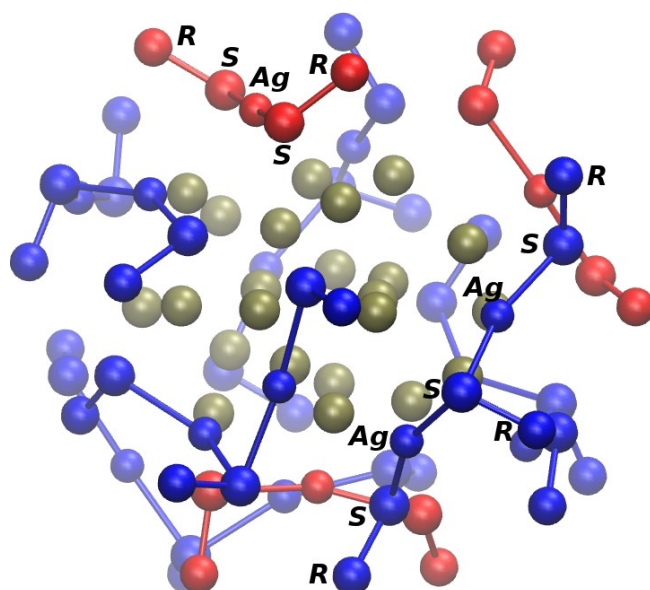

**Figure S4:** Representation of the nanocluster geometry calculated by DFT approach. In red are reported the backbone of the 3  $L_1$  ligands, in blue are the 6  $L_2$  ligands, and in tan are represented the 23 Ag atoms of the metal core. For sake of simplicity the labels are reported only for one  $L_1$  and for one  $L_2$  ligands.

**Table S2:** Van der Waals Interactions

| Atom id | R (Å) | E (Kcal/mol) |
|---------|-------|--------------|
| 15      | 2.15  | 0.202        |
| 17      | 2.15  | 0.202        |
| 45      | 1.93  | 0.043        |
| 107     | 1.93  | 0.043        |
| 152     | 2.5   | 0.200        |

**Table S3:** Van der Waals Pair Interactions

| Pair Atom id | R (Å) | E (Kcal/mol) |
|--------------|-------|--------------|
| 152 15       | 2.7   | 1.10         |
| 152 157      | 2.75  | 37.65        |
| 152 158      | 2.75  | 37.65        |

**Table S4:** Hydrogen Bond Interactions

| Pair Atom id | R (Å) | E (Kcal/mol) |
|--------------|-------|--------------|
| 15 21        | 2.68  | 1.35         |
| 17 21        | 2.55  | 0.60         |

**Table S5:** Bond Interactions

| Pair Atom id | R (Å) | E (Kcal/mol/Å <sup>2</sup> ) |
|--------------|-------|------------------------------|
| 1 15         | 3.00  | 129.8517                     |
| 1 17         | 2.95  | 129.4920                     |
| 1 107        | 4.48  | 104.5288                     |
| 10 45        | 18.6  | 82.0116                      |
| 15 15        | 2.62  | 145.2469                     |
| 15 157       | 1.81  | 172.6560                     |
| 15 158       | 1.81  | 172.6560                     |
| 17 157       | 1.81  | 172.6560                     |

|    |     |       |          |
|----|-----|-------|----------|
| 17 | 158 | 1.81  | 172.6560 |
| 45 | 107 | 11.30 | 88.4862  |

**Table S6:** Angle Interactions

| Triplet Atom id |     |     | Force constant<br>(kcal/mole/radian <sup>2</sup> ) | $\Theta^0$ (deg.) | $\Theta^1$ (deg.) | $\Theta^2$ (deg.) |
|-----------------|-----|-----|----------------------------------------------------|-------------------|-------------------|-------------------|
| 1               | 1   | 15  | 33.77                                              | 108.0             | 109.5             | 110.1             |
| 1               | 1   | 17  | 29.66                                              | 107.5             | 104.7             | 106.0             |
| 1               | 1   | 107 | 22.82                                              | 108.5             |                   |                   |
| 1               | 15  | 1   | 38.33                                              | 95.9              |                   |                   |
| 1               | 15  | 157 | 56.97                                              | 105.8             |                   |                   |
| 1               | 15  | 158 | 56.97                                              | 105.8             |                   |                   |
| 1               | 17  | 157 | 56.97                                              | 105.8             |                   |                   |
| 1               | 17  | 158 | 56.97                                              | 105.8             |                   |                   |
| 1               | 107 | 45  | 54.76                                              | 105.2             |                   |                   |
| 5               | 1   | 15  | 33.77                                              | 110.8             | 110.8             | 108.0             |
| 5               | 1   | 17  | 32.63                                              | 105.0             | 105.0             | 107.7             |
| 5               | 1   | 107 | 38.10                                              | 108.5             |                   |                   |
| 10              | 45  | 107 | 33.77                                              | 180.0             |                   |                   |
| 15              | 157 | 15  | 33.36                                              | 165.7             |                   |                   |
| 15              | 157 | 17  | 33.36                                              | 165.7             |                   |                   |
| 15              | 158 | 15  | 33.36                                              | 135.7             |                   |                   |
| 15              | 158 | 17  | 33.36                                              | 135.7             |                   |                   |
| 17              | 157 | 17  | 33.36                                              | 165.7             |                   |                   |
| 17              | 158 | 17  | 33.36                                              | 135.7             |                   |                   |
| 157             | 17  | 157 | 10.97                                              | 100.0             |                   |                   |
| 157             | 17  | 158 | 10.97                                              | 100.0             |                   |                   |
| 158             | 17  | 158 | 10.97                                              | 100.0             |                   |                   |

\*(the central atom of the angle is attached to 0, 1 or 2 additional hydrogen atoms, respectively)

**Table S7:** Torsional Interactions

| Quartet Atom id | Periodicity=1 |                        | Periodicity=2 |                        | Periodicity=3 |                        |          |         |        |
|-----------------|---------------|------------------------|---------------|------------------------|---------------|------------------------|----------|---------|--------|
|                 | Amplitude     | Phase offset<br>(deg.) | Amplitude     | Phase offset<br>(deg.) | Amplitude     | Phase offset<br>(deg.) |          |         |        |
| 1               | 1             | 1                      | 15            | 0.0000                 | 0.0000        | 0.2000                 | 180.0000 | 0.4000  | 0.0000 |
| 1               | 1             | 1                      | 17            | 1.5000                 | 0.0000        | -0.8000                | 180.0000 | 0.1000  | 0.0000 |
| 1               | 1             | 1                      | 107           | -1.0000                | 0.0000        | 0.0000                 | 180.0000 | -1.2000 | 0.0000 |
| 1               | 1             | 15                     | 1             | -0.4400                | 0.0000        | -0.2600                | 180.0000 | 0.6000  | 0.0000 |
| 1               | 1             | 15                     | 15            | -0.2000                | 0.0000        | 0.0000                 | 180.0000 | 0.0000  | 0.0000 |
| 1               | 1             | 15                     | 44            | -0.5000                | 0.0000        | 0.0000                 | 180.0000 | 0.2670  | 0.0000 |
| 1               | 1             | 15                     | 157           | 0.3965                 | -0.2570       | 0.5456                 | -0.3133  | 0.7386  | 0.3878 |
| 1               | 1             | 15                     | 158           | 0.3965                 | -0.2570       | 0.5456                 | -0.3133  | 0.7386  | 0.3878 |
| 1               | 1             | 17                     | 1             | -0.8000                | 0.0000        | 0.0000                 | 180.0000 | 1.2000  | 0.0000 |
| 1               | 1             | 17                     | 5             | -0.8000                | 0.0000        | -0.7000                | 180.0000 | 0.1000  | 0.0000 |
| 1               | 1             | 17                     | 157           | 0.3965                 | -0.2570       | 0.5456                 | -0.3133  | 0.7386  | 0.3878 |
| 1               | 1             | 17                     | 157           | 0.1983                 | -0.2570       | 0.2728                 | -0.3133  | 0.3693  | 0.3878 |
| 1               | 1             | 17                     | 158           | 0.1983                 | -0.2570       | 0.2728                 | -0.3133  | 0.3693  | 0.3878 |
| 1               | 1             | 107                    | 45            | 0.0000                 | 0.0000        | 0.0000                 | 180.0000 | -0.4000 | 0.0000 |
| 1               | 15            | 15                     | 1             | 1.8500                 | 0.0000        | -7.5550                | 180.0000 | 2.3400  | 0.0000 |
| 1               | 15            | 157                    | 15            | 0.0000                 | 0.0000        | 0.0000                 | 180.0000 | 0.0000  | 0.0000 |
| 1               | 15            | 157                    | 17            | 0.0000                 | 0.0000        | 0.0000                 | 180.0000 | 0.0000  | 0.0000 |

|     |    |     |     |         |        |         |          |         |        |
|-----|----|-----|-----|---------|--------|---------|----------|---------|--------|
| 1   | 15 | 158 | 15  | 0.0000  | 0.0000 | 0.0000  | 180.0000 | 0.0000  | 0.0000 |
| 1   | 15 | 158 | 17  | 0.0000  | 0.0000 | 0.0000  | 180.0000 | 0.0000  | 0.0000 |
| 1   | 17 | 157 | 15  | 0.0000  | 0.0000 | 0.0000  | 180.0000 | 0.0000  | 0.0000 |
| 1   | 17 | 157 | 17  | 0.0000  | 0.0000 | 0.0000  | 180.0000 | 0.0000  | 0.0000 |
| 1   | 17 | 158 | 15  | 0.0000  | 0.0000 | 0.0000  | 180.0000 | 0.0000  | 0.0000 |
| 1   | 17 | 158 | 17  | 0.0000  | 0.0000 | 0.0000  | 180.0000 | 0.0000  | 0.0000 |
| 5   | 1  | 1   | 15  | 0.0000  | 0.0000 | 0.0000  | 180.0000 | 0.5400  | 0.0000 |
| 5   | 1  | 1   | 17  | 0.0000  | 0.0000 | 0.0000  | 180.0000 | 0.1250  | 0.0000 |
| 5   | 1  | 1   | 107 | 0.0000  | 0.0000 | 0.0000  | 180.0000 | -0.4000 | 0.0000 |
| 5   | 1  | 15  | 1   | 0.0000  | 0.0000 | 0.0000  | 180.0000 | 0.6600  | 0.0000 |
| 5   | 1  | 15  | 15  | 0.3000  | 0.0000 | 0.0000  | 180.0000 | 0.6000  | 0.0000 |
| 5   | 1  | 15  | 157 | 0.0000  | 0.0000 | 0.0000  | 180.0000 | 0.6865  | 0.0150 |
| 5   | 1  | 15  | 158 | 0.0000  | 0.0000 | 0.0000  | 180.0000 | 0.6865  | 0.0150 |
| 5   | 1  | 17  | 1   | 0.0000  | 0.0000 | 0.0000  | 180.0000 | 0.6000  | 0.0000 |
| 5   | 1  | 17  | 5   | 0.0000  | 0.0000 | 0.0000  | 180.0000 | 0.7000  | 0.0000 |
| 5   | 1  | 17  | 157 | 0.0000  | 0.0000 | 0.0000  | 180.0000 | 0.6865  | 0.0150 |
| 5   | 1  | 17  | 158 | 0.0000  | 0.0000 | 0.0000  | 180.0000 | 0.6865  | 0.0150 |
| 5   | 1  | 107 | 45  | 0.0000  | 0.0000 | 0.0000  | 180.0000 | 0.0000  | 0.0000 |
| 6   | 1  | 1   | 15  | -0.7000 | 0.0000 | 0.8000  | 180.0000 | -0.1000 | 0.0000 |
| 6   | 1  | 1   | 17  | -0.8000 | 0.0000 | -1.2000 | 180.0000 | -0.7000 | 0.0000 |
| 10  | 45 | 107 | 1   | 0.0000  | 0.0000 | 0.0000  | 180.0000 | 0.0000  | 0.0000 |
| 15  | 1  | 1   | 15  | 1.2500  | 0.0000 | -0.3000 | 180.0000 | 0.0000  | 0.0000 |
| 15  | 1  | 1   | 17  | 0.0000  | 0.0000 | 0.0000  | 180.0000 | 0.0000  | 0.0000 |
| 15  | 1  | 15  | 1   | 0.0000  | 0.0000 | -0.9000 | 180.0000 | 0.3000  | 0.0000 |
| 15  | 1  | 15  | 15  | 0.2000  | 0.0000 | 0.0000  | 180.0000 | 0.1000  | 0.0000 |
| 15  | 1  | 17  | 1   | 0.0000  | 0.0000 | 0.0000  | 180.0000 | 0.0000  | 0.0000 |
| 17  | 1  | 1   | 17  | 0.0000  | 0.0000 | 0.0000  | 180.0000 | 0.1250  | 0.0000 |
| 17  | 1  | 15  | 1   | 0.0000  | 0.0000 | 0.0000  | 180.0000 | 0.0000  | 0.0000 |
| 17  | 1  | 17  | 1   | 0.0000  | 0.0000 | 0.0000  | 180.0000 | 0.0000  | 0.0000 |
| 157 | 15 | 157 | 15  | 0.0000  | 0.0000 | 0.0000  | 180.0000 | 0.0000  | 0.0000 |
| 157 | 15 | 157 | 17  | 0.0000  | 0.0000 | 0.0000  | 180.0000 | 0.0000  | 0.0000 |
| 157 | 15 | 158 | 15  | 0.0000  | 0.0000 | 0.0000  | 180.0000 | 0.0000  | 0.0000 |
| 157 | 15 | 158 | 17  | 0.0000  | 0.0000 | 0.0000  | 180.0000 | 0.0000  | 0.0000 |
| 157 | 17 | 157 | 15  | 0.0000  | 0.0000 | 0.0000  | 180.0000 | 0.0000  | 0.0000 |
| 157 | 17 | 157 | 17  | 0.0000  | 0.0000 | 0.0000  | 180.0000 | 0.0000  | 0.0000 |
| 157 | 17 | 158 | 15  | 0.0000  | 0.0000 | 0.0000  | 180.0000 | 0.0000  | 0.0000 |
| 157 | 17 | 158 | 17  | 0.0000  | 0.0000 | 0.0000  | 180.0000 | 0.0000  | 0.0000 |
| 158 | 15 | 157 | 15  | 0.0000  | 0.0000 | 0.0000  | 180.0000 | 0.0000  | 0.0000 |
| 158 | 15 | 157 | 17  | 0.0000  | 0.0000 | 0.0000  | 180.0000 | 0.0000  | 0.0000 |
| 158 | 15 | 158 | 15  | 0.0000  | 0.0000 | 0.0000  | 180.0000 | 0.0000  | 0.0000 |
| 158 | 15 | 158 | 17  | 0.0000  | 0.0000 | 0.0000  | 180.0000 | 0.0000  | 0.0000 |
| 158 | 17 | 157 | 15  | 0.0000  | 0.0000 | 0.0000  | 180.0000 | 0.0000  | 0.0000 |
| 158 | 17 | 157 | 17  | 0.0000  | 0.0000 | 0.0000  | 180.0000 | 0.0000  | 0.0000 |
| 158 | 17 | 158 | 15  | 0.0000  | 0.0000 | 0.0000  | 180.0000 | 0.0000  | 0.0000 |
| 158 | 17 | 158 | 17  | 0.0000  | 0.0000 | 0.0000  | 180.0000 | 0.0000  | 0.0000 |

**Table S8:** Partial Charge

Atom id Partial Charge (e)

10

-0.5

45  
107

1  
-0.5

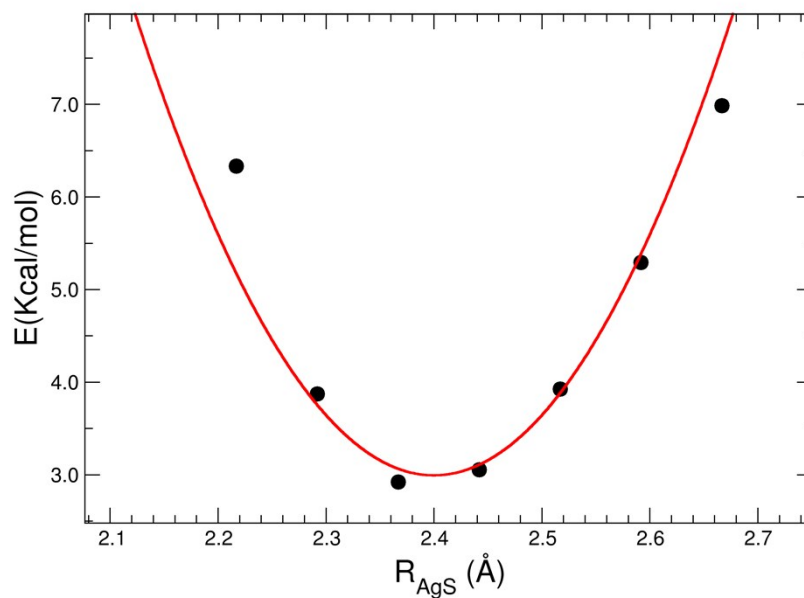

Figure S5: DFT potential energy scan for the L1 ligand along the Ag-S coordinate.

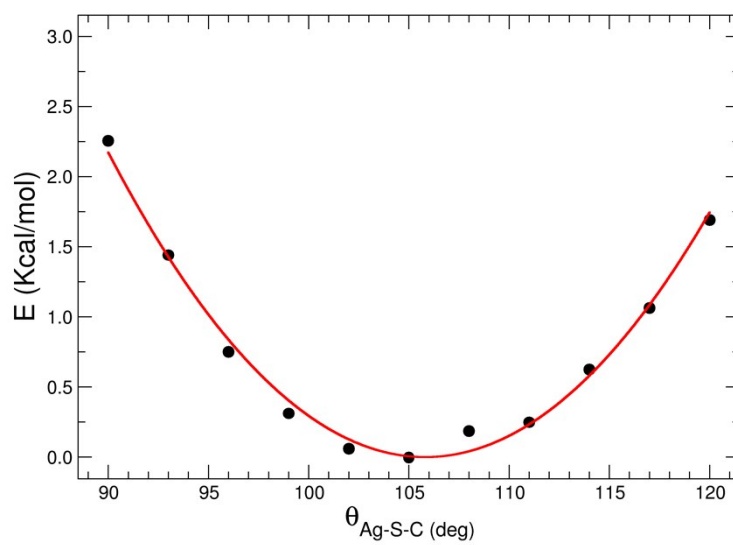

Figure S6: DFT potential energy scan for the L1 ligand along the Ag-S-C angle.



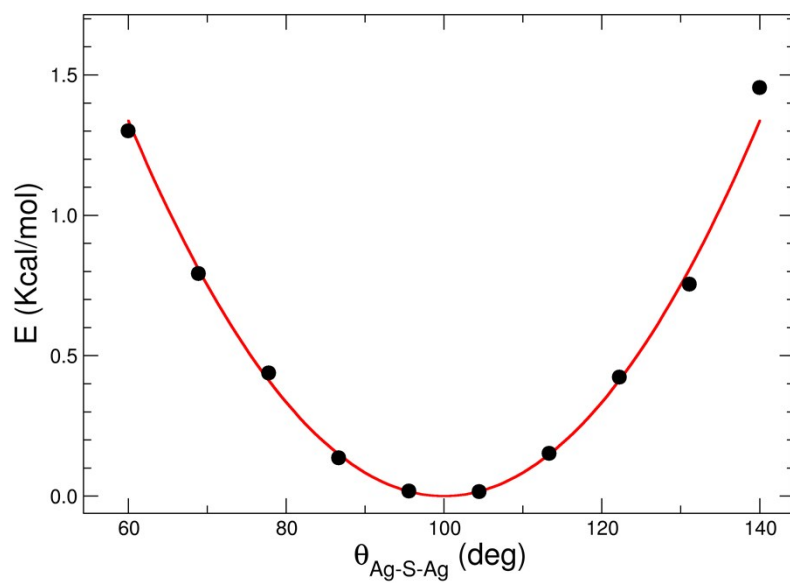

**Figure S7:** DFT potential energy scan for the L1 ligand along the Ag-S-Ag angle.

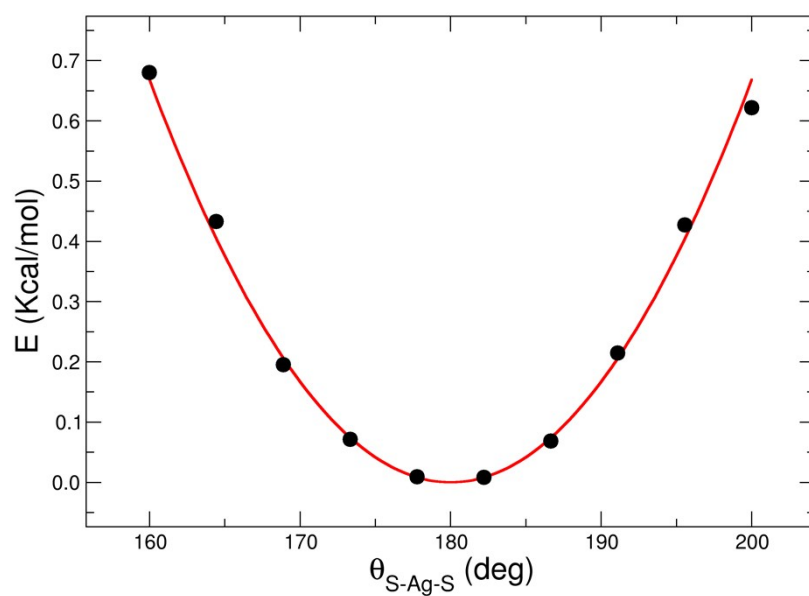

**Figure S8:** DFT potential energy scan for the L1 ligand along the S-Ag-S angle.

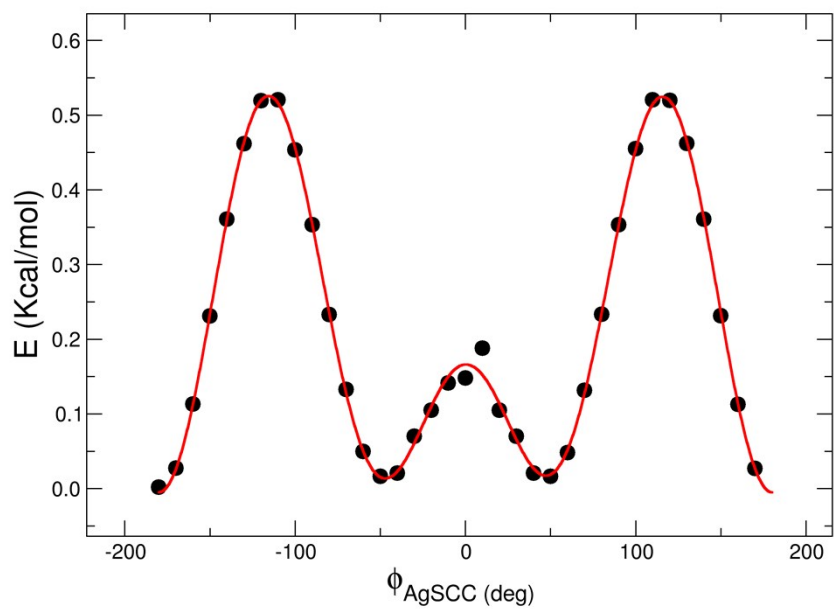

**Figure S9:** DFT potential energy scan for the L1 ligand along the Ag-S-C-C dihedral angle.
